# Supplementary material
Source: PubMed Central journal article supplement (PMC8321509)
Supplement: NIHMS1717032-supplement-appendix.pdf [file NIHMS1717032-supplement-appendix.pdf]

## APPENDIX 1: PubMed search strategy

**Date Searched:** April 2, 2018

**Final number of results: 590**

(((((gun[tiab] OR guns[tiab] OR handgun\*[tiab] OR firearm\*[tiab] OR firearms[MeSH Terms] OR gunshot\*[tiab] OR shooting\*[tiab] OR "gun violence"[tiab] OR "gun safety"[tiab]))) AND ("wounds, gunshot"[MeSH Terms] OR "Wounds and Injuries"[Mesh] OR injury[tiab] OR injuries[tiab] OR mortality[tiab] OR intentional[tiab] OR unintentional[tiab] OR accidental[tiab] OR accident\*[tiab]))) AND ((adolescent[MeSH Terms] OR youth[MeSH Terms] OR child[MeSH Terms] OR teenager[Title/Abstract] OR teen[Title/Abstract] OR adolescen\*[Title/Abstract] OR child[Title/Abstract] OR youth[title/abstract] OR children[Title/Abstract] OR minor[Title/Abstract] OR minors[title/abstract] OR delinquent[Title/Abstract] OR delinquency[Title/Abstract] OR pediatric\*[Title/Abstract] OR parent\*[tiab]))) AND ("Recurrence"[Mesh] OR recurren\*[tiab] OR "Recidivism"[Mesh] OR recidivism[tiab] OR "Follow-Up Studies"[Mesh] OR "follow-up"[tiab] OR "follow up"[tiab] OR "Exposure to Violence"[Mesh] OR "Life Change Events"[Mesh] OR "Patient Readmission"[Mesh] OR readmission[tiab] OR rehospitalization[tiab] OR "Secondary Prevention"[Mesh] OR "Tertiary Prevention"[Mesh] OR psychosocial[tiab] OR "Mental Health Services"[Mesh] OR "criminal justice" OR "Prisons"[Mesh] OR incarceration[tiab] OR imprisonment[tiab] OR detention[tiab] OR custody[tiab] OR subsequent[tiab])Filters:  
Publication date from 1985/01/01 to 2018/12/31

**Filters:** Publication date from 1985/01/01 to 2018/04/01
